# Supplementary material
Source: ML conference proceedings conference paper supplement (https://proceedings.neurips.cc/paper_files/paper/2019/hash/2751fae77b24c37382cf6464173d145e-Abstract.html)
Supplement: Supplementary file [file 2751fae77b24c37382cf6464173d145e-Supplemental.zip]

## A Decoupling for Martingales

The following definitions are from [36, Chapter 6].

**Definition 2** Let  $\{e_i\}$  and  $\{d_i\}$  be two sequences of random variables adapted to the  $\sigma$ -fields  $\{\mathcal{F}_i\}$ . Then  $\{e_i\}$  and  $\{d_i\}$  are tangent with respect to  $\{\mathcal{F}_i\}$  if, for all  $i$ ,

$$p(d_i|\mathcal{F}_{i-1}) = p(e_i|\mathcal{F}_{i-1}) , \quad (29)$$

where  $p(d_i|\mathcal{F}_{i-1})$  denotes the conditional probability of  $d_i$  given  $\mathcal{F}_{i-1}$ .

**Definition 3** A sequence  $\{e_i\}$  of random variables adapted to an increasing sequence of  $\sigma$ -fields  $\mathcal{F}_i$  contained in  $\mathcal{F}$  is said to satisfy the CI condition (conditional independence) if there exists a  $\sigma$ -algebra  $\mathcal{G}$ , contained in  $\mathcal{F}$  such that  $\{e_i\}$  is conditionally independent given  $\mathcal{G}$ , and  $p(e_i|\mathcal{F}_{i-1}) = p(e_i|\mathcal{G})$ .

**Definition 4** A sequence  $\{e_i\}$  which satisfies the CI condition and which is also tangent to  $\{d_i\}$  is said to be a decoupled tangent sequence to  $\{d_i\}$ .

The following result is from [36, Proposition 6.1.5].

**Proposition 1** For any sequence of random variables  $\{d_i\}$  adapted to an increasing sequence  $\mathcal{F}_i$  of a  $\sigma$ -algebras, there always exists a decoupled sequence  $\{e_i\}$  (on a possibly enlarged probability space) which is tangent to the original sequence and in addition conditionally independent given a master  $\sigma$ -field  $\mathcal{G}$ . Frequently  $\mathcal{G} = \sigma(\{d_i\})$ .

Next we state our main decoupling result:

**Theorem 3** Let  $\Xi = \{\xi_i\}$  be a martingale difference sequence adapted to an increasing sequence of  $\sigma$ -fields  $\{\mathcal{F}_i\}$ . Let  $\Xi' = \{\xi'_i\}$  be any decoupled tangent sequence to  $\Xi = \{\xi_i\}$ . Let  $\mathcal{B}$  be a collection of  $(n \times n)$  symmetric matrices. Let  $F$  be a convex function. Then,

$$E_{\Xi} \left[ \sup_{B \in \mathcal{B}} F \left( \sum_{\substack{j,k=1 \\ j \neq k}}^n \xi_j \xi_k B_{j,k} \right) \right] \leq 4 E_{\Xi, \Xi'} \left[ \sup_{B \in \mathcal{B}} F \left( \sum_{j,k=1}^n \xi_j \xi'_k B_{j,k} \right) \right] . \quad (30)$$

Our proof relies on the following results characterizing distributional equivalence of quadratic forms of tangent sequences. Note that our main result needs decoupled tangent sequences where the additional decoupling property will be used to handle the diagonal terms. We start with the following result:

**Lemma 2** Let  $\Xi = \{\xi_i\}$  be a martingale difference sequence adapted to an increasing sequence of  $\sigma$ -fields  $\{\mathcal{F}_i\}$ . Let  $\Xi' = \{\xi'_i\}$  be any tangent sequence to  $\Xi = \{\xi_i\}$ . Let  $B$  be a symmetric  $(n \times n)$  matrix. Consider the random variables

$$X_n = \sum_{\substack{j,k=1 \\ j < k}}^n \xi_j \xi_k B_{j,k} , \quad \text{and} \quad X'_n = \sum_{\substack{j,k=1 \\ j < k}}^n \xi_j \xi'_k B_{j,k} . \quad (31)$$

Then  $X_n$  and  $X'_n$  are identically distributed.

*Proof:* We do the proof by induction. When  $n = 2$ , we have

$$X_2 = \xi_1 \xi_2 B_{1,2} \quad \text{and} \quad X'_2 = \xi_1 \xi'_2 B_{1,2} .$$

436 So, the distribution of  $X_2$  is

$$\begin{aligned}
P(X_2 \leq x) &= P_{\xi_1, \xi_2}(\xi_1 \xi_2 B_{1,2} \leq x) \\
&= P_{\xi_1, \xi_2}(\xi_1 \xi_2 B_{1,2} \leq x, \xi_1 \geq 0) + P_{\xi_1, \xi_2}(\xi_1 \xi_2 B_{1,2} \leq x, \xi_1 \leq 0) \\
&= P_{\xi_1, \xi_2}(\xi_2 \leq x/(\xi_1 B_{1,2}), \xi_1 \geq 0) + P_{\xi_1, \xi_2}(\xi_2 \leq x/(\xi_1 B_{1,2}), \xi_1 \leq 0) \\
&= \int_0^\infty p_{\xi_1}(z_1) \left[ \int_{-\infty}^{x/(z_1 B_{1,2})} p_{\xi_2|\mathcal{F}_1}(z_2) dz_2 \right] dz_1 + \int_{-\infty}^0 p_{\xi_1}(z_1) \left[ \int_{x/(z_1 B_{1,2})}^\infty p_{\xi_2|\mathcal{F}_1}(z_2) dz_2 \right] dz_1 \\
&\stackrel{(a)}{=} \int_0^\infty p_{\xi_1}(z_1) \left[ \int_{-\infty}^{x/(z_1 B_{1,2})} p_{\xi'_2|\mathcal{F}_1}(z_2) dz_2 \right] dz_1 + \int_{-\infty}^0 p_{\xi_1}(z_1) \left[ \int_{x/(z_1 B_{1,2})}^\infty p_{\xi'_2|\mathcal{F}_1}(z_2) dz_2 \right] dz_1 \\
&= P_{\xi_1, \xi'_2}(\xi'_2 \leq x/(\xi_1 B_{1,2}), \xi_1 \geq 0) + P_{\xi_1, \xi'_2}(\xi'_2 \leq x/(\xi_1 B_{1,2}), \xi_1 \leq 0) \\
&= P_{\xi_1, \xi'_2}(\xi_1 \xi'_2 B_{1,2} \leq x) \\
&= P(X'_2 \leq x),
\end{aligned}$$

437 where (a) follows since  $\xi_2|\xi_1$  and  $\xi'_2|\xi_1$  are identically distributed. Note that for (a), the conditioning  
438 is on  $\mathcal{F}_1(z_1)$ , but we do not show this explicitly. Thus, the statement holds for  $n = 2$ .

439 We continue with the proof by induction. Assume that the statement is true for some  $m$  so that

$$X_m = \sum_{\substack{j,k=1 \\ j < k}}^m \xi_j \xi_k B_{j,k}, \quad \text{and} \quad X'_m = \sum_{\substack{j,k=1 \\ j < k}}^m \xi_j \xi'_k B_{j,k}$$

440 are identically distributed so that

$$P(X_m \leq x) = P(X'_m \leq x).$$

441 Now, by definition

$$X_{m+1} = X_m + \xi_{m+1} \sum_{j=1}^m \xi_j B_{j,m+1} \quad \text{and} \quad X'_{m+1} = X'_m + \xi'_{m+1} \sum_{j=1}^m \xi_j B_{j,m+1}.$$

442 The distribution of  $X_{m+1}$  is

$$\begin{aligned}
P(X_{m+1} \leq x) &= P\left(X_m + \xi_{m+1} \sum_{j=1}^m \xi_j B_{j,m+1} \leq x\right) \\
&= \int_{-\infty}^\infty P\left(X_m + \xi_{m+1} \sum_{j=1}^m \xi_j B_{j,m+1} \leq x \mid X_m = x_m\right) p_{X_m}(x_m) dx_m \\
&= \int_{-\infty}^\infty P\left(\xi_{m+1} \sum_{j=1}^m \xi_j B_{j,m+1} \leq x - x_m\right) p_{X_m}(x_m) dx_m
\end{aligned}$$

443 First, note that  $p_{X_m}(x_m) = p_{X'_m}(x_m)$  since  $X_m$  and  $X'_m$  are identically distribution. For the first  
 444 term, making the random variables explicit, note that

$$\begin{aligned}
 P_{\xi_1, \dots, \xi_m, \xi_{m+1}} \left( \xi_{m+1} \sum_{j=1}^m \xi_j B_{j,m+1} \leq x - x_m \right) \\
 &= P_{\xi_1, \dots, \xi_m, \xi_{m+1}} \left( \xi_{m+1} \sum_{j=1}^m \xi_j B_{j,m+1} \leq x - x_m, \sum_{j=1}^m \xi_j B_{j,m+1} \geq 0 \right) \\
 &\quad + P_{\xi_1, \dots, \xi_m, \xi_{m+1}} \left( \xi_{m+1} \sum_{j=1}^m \xi_j B_{j,m+1} \leq x - x_m, \sum_{j=1}^m \xi_j B_{j,m+1} \leq 0 \right) \\
 &= P_{\xi_1, \dots, \xi_m, \xi_{m+1}} \left( \xi_{m+1} \leq \frac{x - x_m}{\sum_{j=1}^m \xi_j B_{j,m+1}}, \sum_{j=1}^m \xi_j B_{j,m+1} \geq 0 \right) \\
 &\quad + P_{\xi_1, \dots, \xi_m, \xi_{m+1}} \left( \xi_{m+1} \leq \frac{x - x_m}{\sum_{j=1}^m \xi_j B_{j,m+1}}, \sum_{j=1}^m \xi_j B_{j,m+1} \leq 0 \right)
 \end{aligned}$$

445 To simplify notation, let  $\chi_m = \sum_{j=1}^m \xi_j B_{j,m+1}$ . Note that the distribution of  $\chi_m$  depends on  $\mathcal{F}_m$ ,  
 446 and we explicitly show this dependency as needed in the analysis. Then,

$$\begin{aligned}
 P_{\xi_1, \dots, \xi_m, \xi_{m+1}} \left( \xi_{m+1} \sum_{j=1}^m \xi_j B_{j,m+1} \leq x - x_m \right) \\
 &= P_{\mathcal{F}_m, \xi_{m+1}} \left( \xi_{m+1} \leq \frac{x - x_m}{\chi_m}, \chi_m \geq 0 \right) + P_{\mathcal{F}_m, \xi_{m+1}} \left( \xi_{m+1} \leq \frac{x - x_m}{\chi_m}, \chi_m \leq 0 \right) \\
 &= \int_0^\infty p_{\chi_m}(z_m) \left[ \int_{-\infty}^{(x-x_m)/z_m} p_{\xi_{m+1}|\mathcal{F}_m}(z_{m+1}) dz_{m+1} \right] dz_m \\
 &\quad + \int_{-\infty}^0 p_{\chi_m}(z_m) \left[ \int_{(x-x_m)/z_m}^\infty p_{\xi_{m+1}|\mathcal{F}_m}(z_{m+1}) dz_{m+1} \right] dz_m \\
 &\stackrel{(a)}{=} \int_0^\infty p_{\chi_m}(z_m) \left[ \int_{-\infty}^{(x-x_m)/z_m} p_{\xi'_{m+1}|\mathcal{F}_m}(z_{m+1}) dz_{m+1} \right] dz_m \\
 &\quad + \int_{-\infty}^0 p_{\chi_m}(z_m) \left[ \int_{(x-x_m)/z_m}^\infty p_{\xi'_{m+1}|\mathcal{F}_m}(z_{m+1}) dz_{m+1} \right] dz_m \\
 &= P_{\mathcal{F}_m, \xi'_{m+1}} \left( \xi'_{m+1} \leq \frac{x - x_m}{\chi_m}, \chi_m \geq 0 \right) + P_{\mathcal{F}_m, \xi'_{m+1}} \left( \xi'_{m+1} \leq \frac{x - x_m}{\chi_m}, \chi_m \leq 0 \right) \\
 &= P_{\mathcal{F}_m, \xi'_{m+1}} \left( \xi'_{m+1} \sum_{j=1}^m \xi_j B_{j,m+1} \leq x - x_m \right) .
 \end{aligned}$$

447 That completes the proof. ■

448 Lemma 2 focuses on the lower triangle of the symmetric matrix  $B$ . The next result extends the  
 449 distributional equivalence to the full matrix  $B$ .

450 **Lemma 3** Let  $\Xi = \{\xi_i\}$  be a martingale difference sequence adapted to an increasing sequence of  
 451  $\sigma$ -fields  $\{\mathcal{F}_i\}$ . Let  $\Xi' = \{\xi'_i\}$  be any tangent sequence to  $\Xi = \{\xi_i\}$ . Let  $B$  be a symmetric  $(n \times n)$   
 452 matrix. Consider the random variables

$$Z_n = \sum_{\substack{j,k=1 \\ j \neq k}}^n \xi_j \xi_k B_{j,k} , \quad \text{and} \quad Z'_n = \sum_{\substack{j,k=1 \\ j \neq k}}^n \xi_j \xi'_k B_{j,k} . \quad (32)$$

453 Then  $Z_n$  and  $Z'_n$  are identically distributed.

454 *Proof:* Following Lemma 2, with

$$X_n^{(L)} = \sum_{\substack{j,k=1 \\ j < k}}^n \xi_j \xi_k B_{j,k}, \quad \text{and} \quad X_n'^{(L)} = \sum_{\substack{j,k=1 \\ j < k}}^n \xi_j \xi'_k B_{j,k}, \quad (33)$$

455 we have  $X_n \sim X'_n$ , i.e., identically distributed. Similarly, with

$$Y_n'' = \sum_{\substack{j,k=1 \\ j > k}}^n \xi'_j \xi'_k B_{j,k}, \quad \text{and} \quad X_n'^{(U)} = \sum_{\substack{j,k=1 \\ j > k}}^n \xi_j \xi'_k B_{j,k}, \quad (34)$$

456 an application of Lemma 2 by interchanging  $\Xi = \{\xi\}$  and  $\Xi = \{\xi'\}$  implies  $Y_n'' \sim X_n'^{(U)}$ , and  
 457 we now provide more details to justify this. First, we switch the notation  $j, k$  in (34) and use  
 458  $B_{j,k} = B_{k,j}$  to get

$$Y_n'' = \sum_{\substack{j,k=1 \\ j < k}}^n \xi'_j \xi'_k B_{j,k}, \quad \text{and} \quad X_n'^{(U)} = \sum_{\substack{j,k=1 \\ j < k}}^n \xi'_j \xi_k B_{j,k}. \quad (35)$$

459 Now, interchanging  $\{\xi_j\}$  and  $\{\xi'_j\}$ , we have

$$Y_n'' = \sum_{\substack{j,k=1 \\ j < k}}^n \xi_j \xi_k B_{j,k}, \quad \text{and} \quad X_n'^{(U)} = \sum_{\substack{j,k=1 \\ j < k}}^n \xi_j \xi'_k B_{j,k}. \quad (36)$$

460 Now  $Y_n'' \sim X_n'^{(U)}$  follows from Lemma 2.

461 Continuing with the analysis, since  $\Xi$  and  $\Xi'$  are tangent sequences, by interchanging  $\Xi' = \{\xi'_j\}$  and  
 462  $\Xi = \{\xi_j\}$  are tangent sequences, with

$$Y_n'' = \sum_{\substack{j,k=1 \\ j > k}}^n \xi'_j \xi'_k B_{j,k}, \quad \text{and} \quad X_n^{(U)} = \sum_{\substack{j,k=1 \\ j > k}}^n \xi_j \xi_k B_{j,k}, \quad (37)$$

463 we have  $Y_n'' \sim X_n^{(U)}$ . Then, from (34) and (37), we have  $X_n^{(U)} \sim X_n'^{(U)}$ . Combining this with  
 464 (33), we have

$$X_n^{(L)} + X_n^{(U)} \sim X_n'^{(L)} + X_n'^{(U)}. \quad (38)$$

465 That completes the proof. ■

466 *Proof of Theorem 3:* Let  $\Delta = \{\delta_1, \dots, \delta_n\}$  be a set of i.i.d. Bernoulli random variables with  $P(\delta_i =$   
 467  $0) = P(\delta_i = 1) = 1/2$ . Since  $B \in \mathcal{B}$  are symmetric, we have

$$\sum_{\substack{j,k=1 \\ j \neq k}}^n \xi_j \xi_k B_{j,k} = 4E_\Delta \left[ \sum_{\substack{j,k=1 \\ j \neq k}}^n \delta_i (1 - \delta_j) \xi_j \xi_k B_{j,k} \right]. \quad (39)$$

468 By Jensen's inequality

$$\begin{aligned}
F\left(\sum_{\substack{j,k=1 \\ j \neq k}}^n \xi_j \xi_k B_{j,k}\right) &= F\left(4E_{\Delta} \left[\sum_{\substack{j,k=1 \\ j \neq k}}^n \delta_i(1 - \delta_j) \xi_j \xi_k B_{j,k}\right]\right) \\
&\leq 4E_{\Delta} F\left(\sum_{\substack{j,k=1 \\ j \neq k}}^n \delta_i(1 - \delta_j) \xi_j \xi_k B_{j,k}\right) \\
\Rightarrow \sup_{B \in \mathcal{B}} F\left(\sum_{\substack{j,k=1 \\ j \neq k}}^n \xi_j \xi_k B_{j,k}\right) &\leq 4 \sup_{B \in \mathcal{B}} E_{\Delta} F\left(\sum_{\substack{j,k=1 \\ j \neq k}}^n \delta_i(1 - \delta_j) \xi_j \xi_k B_{j,k}\right) \\
\Rightarrow E_{\Xi} \left[ \sup_{B \in \mathcal{B}} F\left(\sum_{\substack{j,k=1 \\ j \neq k}}^n \xi_j \xi_k B_{j,k}\right) \right] &\leq 4E_{\Xi} \left[ \sup_{B \in \mathcal{B}} E_{\Delta} F\left(\sum_{\substack{j,k=1 \\ j \neq k}}^n \delta_i(1 - \delta_j) \xi_j \xi_k B_{j,k}\right) \right].
\end{aligned}$$

469 Consider a fixed realization  $\Delta_r = \{\delta_{1,r}, \dots, \delta_{n,r}\}$  of  $\Delta$ , and consider the subset  $I = \{i \in [n] | \delta_{i,r} =$   
470  $1\}$ . Lets  $I^c$  be the complement set. Then,

$$4 \left[ \sum_{\substack{j,k=1 \\ j \neq k}}^n \delta_{i,r}(1 - \delta_{j,r}) \xi_j \xi_k B_{j,k} \right] = 4 \left[ \sum_{\substack{(j,k) \in I \times I^c \\ j \neq k}} \xi_j \xi_k B_{j,k} \right]. \quad (40)$$

471 Since  $\Xi' = \{\xi'_i\}$  is a tangent sequence to  $\Xi = \{\xi_i\}$ , by Lemma 3, we have

$$\begin{aligned}
E_{\Xi} \left[ \sup_{B \in \mathcal{B}} F\left(\sum_{\substack{j,k=1 \\ j \neq k}}^n \xi_j \xi_k B_{j,k}\right) \right] &\leq 4E_{\Xi} \left[ \sup_{B \in \mathcal{B}} E_{\Delta} F\left(\sum_{\substack{j,k=1 \\ j \neq k}}^n \delta_i(1 - \delta_j) \xi_j \xi_k B_{j,k}\right) \right] \\
&= 4E_{\Xi} \left[ \sup_{B \in \mathcal{B}} E_{\Delta} F\left(\sum_{\substack{(j,k) \in I \times I^c \\ j \neq k}} \xi_j \xi_k B_{j,k}\right) \right] \quad (41)
\end{aligned}$$

$$\stackrel{(a)}{=} 4E_{\Xi, \Xi'} \left[ \sup_{B \in \mathcal{B}} E_{\Delta} F\left(\sum_{\substack{(j,k) \in I \times I^c \\ j \neq k}} \xi_j \xi'_k B_{j,k}\right) \right]. \quad (42)$$

472 where (a) follows from the fact that if two random variables are identically distributed, expectations  
473 of the same function applied to them will be the same. The matrix  $\hat{B}$  of interest for Lemma 3 here  
474 is:  $\hat{B}_{j,k} = B_{j,k}$  for  $(j,k) \in I \times I^c, j \neq k$  and 0 otherwise. Let

$$Y(\Delta) \triangleq 4 \sum_{\substack{j,k=1 \\ j \neq k \\ (j,k) \in I \times I^c}}^n \xi_j \xi'_k B_{j,k}, \quad Z(\Delta) \triangleq 4 \sum_{\substack{j,k=1 \\ j \neq k \\ (j,k) \notin I \times I^c}}^n \xi_j \xi'_k B_{j,k}, \quad W \triangleq 4 \sum_{j=1}^n \xi_j \xi'_j B_{j,j}. \quad (43)$$

475 By construction, for every realization  $\Delta_r$ , we have

$$Y(\Delta_r) + Z(\Delta_r) + W = 4 \left[ \sum_{j,k=1}^n \xi_j \xi'_k B_{j,k} \right]. \quad (44)$$

476 Now, by linearity of expectation, we have

$$E_{\Xi, \Xi'}[Z + W] = 4 \sum_{\substack{j,k=1 \\ j \neq k \\ (j,k) \notin I \times I^c}}^n E_{\xi_j, \xi'_k}[\xi_j \xi'_k] B_{j,k} + 4 \sum_{j=1}^n E_{\xi_j, \xi'_j}[\xi_j \xi'_j] B_{j,j} . \quad (45)$$

477 We focus on one term  $E_{\xi_j, \xi'_k}[\xi_j \xi'_k]$ . For  $j < k$ , we have

$$E_{\xi_j, \xi'_k}[\xi_j \xi'_k] = E_{\xi_{1:(k-1)}} \left[ E_{\xi_j, \xi'_k}[\xi_j \xi'_k | \xi_{1:(k-1)}] \right] = E_{\xi_{1:(k-1)}} \left[ \xi_j E_{\xi'_k}[\xi'_k | \xi_{1:(k-1)}] \right] = 0 ,$$

478 since  $\xi'_k | \xi_{1:(k-1)}$  is a martingale difference sequence, which has zero mean. The argument for  
 479  $j > k$  is similar by interchanging  $\Xi$  and  $\Xi'$ . Recall that  $\Xi, \Xi'$  are decoupled tangent sequences,  
 480 and, following Proposition 1, let  $\mathcal{G} = \sigma(\{\xi_j\})$  be the master  $\sigma$ -field with respect to which  $\{\xi'_j\}$  are  
 481 conditionally independent. Then, we have

$$E_{\xi_j, \xi'_j}[\xi_j \xi'_j] = E_{\mathcal{G}} \left[ E_{\xi_j, \xi'_j}[\xi_j \xi'_j | \mathcal{G}] \right] \stackrel{(a)}{=} E_{\mathcal{G}} \left[ \xi_j E_{\xi'_j}[\xi'_j | \mathcal{G}] \right] \stackrel{(b)}{=} E_{\mathcal{G}} \left[ \xi_j E_{\xi'_j}[\xi'_j | \mathcal{F}_{j-1}] \right] \stackrel{(c)}{=} 0 ,$$

482 where (a) follows since  $\xi_j$  is  $\mathcal{G}$ -measurable, (b) follows since  $P(\xi'_j | \mathcal{G}) = p(\xi'_j | \mathcal{F}_{j-1})$  from Defini-  
 483 tion 3, and (c) follows since  $\xi'_j | \mathcal{F}_{j-1}$  is a MDS. As a result, it follows that

$$E_{\Xi, \Xi'}[Z + W] = 0 . \quad (46)$$

484 Now, for any convex function  $H$ , we have  $E_{\Xi, \Xi'} H(Y) = E_{\Xi, \Xi'} H(Y + E_{\Xi, \Xi'}[Z + W]) \leq$   
 485  $E_{\Xi, \Xi'} H(Y + Z + W)$ . Then, from (42), we have

$$\begin{aligned} E_{\Xi} \left[ \sup_{B \in \mathcal{B}} F \left( \sum_{\substack{j,k=1 \\ j \neq k}}^n \xi_j \xi_k B_{j,k} \right) \right] &\leq 4 E_{\Xi, \Xi'} \left[ \sup_{B \in \mathcal{B}} E_{\Delta} F \left( \sum_{\substack{(j,k) \in I \times I^c \\ j \neq k}} \xi_j \xi'_k B_{j,k} \right) \right] \\ &\leq 4 E_{\Xi, \Xi'} \left[ \sup_{B \in \mathcal{B}} E_{\Delta} F \left( \sum_{(j,k)=1}^n \xi_j \xi'_k B_{j,k} \right) \right] \\ &= 4 E_{\Xi, \Xi'} \left[ \sup_{B \in \mathcal{B}} F \left( \sum_{(j,k)=1}^n \xi_j \xi'_k B_{j,k} \right) \right] . \end{aligned}$$

486 That completes the proof. ■

## 487 B Bounds for Sub-Gaussian MDS

### 488 B.1 Overall Analysis

489 For a MDS  $\xi = \{\xi_j\}$ , let

$$C_{\mathcal{A}}(\xi) \triangleq \sup_{A \in \mathcal{A}} \left| \|A\xi\|_2^2 - E\|A\xi\|_2^2 \right| \quad (47)$$

$$B_{\mathcal{A}}(\xi) \triangleq \sup_{A \in \mathcal{A}} \left| \sum_{\substack{j,k=1 \\ j \neq k}}^n \xi_j \xi_k \langle A_j, A_k \rangle \right| \quad (48)$$

$$D_{\mathcal{A}}(\xi) \triangleq \sup_{A \in \mathcal{A}} \left| \sum_{j=1}^n (|\xi_j|^2 - E|\xi_j|^2) \|A_j\|_2^2 \right| \quad (49)$$

490 First, note that the contributions from the off-diagonal terms of  $E\|A\xi\|_2^2$  is 0:

491 **Proposition 2** For  $j \neq k$ ,  $E_{\xi_j, \xi_k}[\xi_j \xi_k] = 0$ .

492 *Proof:* For  $j < k$ , we have

$$E_{\xi_j, \xi_k} [\xi_j \xi_k] = E_{\mathcal{F}_{k-1}} [E_{\xi_j, \xi_k} [\xi_j \xi_k | \mathcal{F}_{k-1}]] = E_{\mathcal{F}_{k-1}} [\xi_j E_{\xi_k} [\xi_k | \mathcal{F}_{k-1}]] = 0,$$

493 since  $\xi_k | \mathcal{F}_{k-1}$  is a martingale difference sequence, which has zero mean. The proof for  $j > k$  is  
 494 similar by switching the roles of  $j$  and  $k$ . ■

495 As a result, we have

$$\begin{aligned} C_{\mathcal{A}}(\xi) &= \sup_{A \in \mathcal{A}} \left| \|A\xi\|_2^2 - E\|A\xi\|_2^2 \right| \\ &= \sup_{A \in \mathcal{A}} \left| \sum_{\substack{j,k=1 \\ j \neq k}}^n \xi_j \xi_k \langle A_j, A_k \rangle + \sum_{j=1}^n (|\xi_j|^2 - E|\xi_j|^2) \|A_j\|_2^2 \right| \\ &\leq \sup_{A \in \mathcal{A}} \left| \sum_{\substack{j,k=1 \\ j \neq k}}^n \xi_j \xi_k \langle A_j, A_k \rangle \right| + \sup_{A \in \mathcal{A}} \left| \sum_{j=1}^n (|\xi_j|^2 - E|\xi_j|^2) \|A_j\|_2^2 \right| \\ &= B_{\mathcal{A}}(\xi) + D_{\mathcal{A}}(\xi) \end{aligned}$$

496 Hence,

$$\|C_{\mathcal{A}}(\xi)\|_p \leq \|B_{\mathcal{A}}(\xi)\|_p + \|D_{\mathcal{A}}(\xi)\|_p. \quad (50)$$

497 We bound  $\|B_{\mathcal{A}}(\xi)\|_p$  in Section B.2 (Theorem 4) and bound  $\|D_{\mathcal{A}}(\xi)\|_p$  in Section B.4 (Theorem 6)  
 498 to get a bound on  $\|C_{\mathcal{A}}(\xi)\|_p$  of the form

$$\|C_{\mathcal{A}}(\xi)\|_p \leq a + \sqrt{p} \cdot b + p \cdot c, \quad \forall p \geq 1. \quad (51)$$

499 Note that these bounds imply, for all  $u$

$$P(|C_{\mathcal{A}}(\xi)| \geq a + b \cdot \sqrt{u} + c \cdot u) \leq e^{-u}, \quad (52)$$

500 or, equivalently

$$P(|C_{\mathcal{A}}(\xi)| \geq a + u) \leq \exp \left\{ -\min \left( \frac{u^2}{4b^2}, \frac{u}{2c} \right) \right\}, \quad (53)$$

501 which yields the main result. In the sequel, to avoid clutter, we mostly avoid all absolute constants  
 502 and constants which depend on  $L$  for  $L$ -sub-Gaussian random variables, i.e., we set them to 1, so  
 503 the key dependencies are clear. We are inspired by similar choices in the related literature [42, 19].

## 504 B.2 The Off-diagonal Terms

505 The main result for the off-diagonal term is the following:

506 **Theorem 4** *Let  $\xi$  be a sub-Gaussian MDS. Then,*

$$\begin{aligned} \|B_{\mathcal{A}}(\xi)\|_p &\leq \gamma_2(\mathcal{A}, \|\cdot\|_{2 \rightarrow 2}) \cdot \left( \gamma_2(\mathcal{A}, \|\cdot\|_{2 \rightarrow 2}) + d_F(\mathcal{A}) \right) \\ &\quad + \sqrt{p} \cdot d_{2 \rightarrow 2}(\mathcal{A}) \cdot \left( \gamma_2(\mathcal{A}, \|\cdot\|_{2 \rightarrow 2}) + d_F(\mathcal{A}) \right) + p \cdot d_{2 \rightarrow 2}^2(\mathcal{A}). \end{aligned}$$

507

508 Note that from Theorem 3, we have

$$\|B_{\mathcal{A}}(\xi)\|_{L_p} \leq \left\| \sup_{A \in \mathcal{A}} \left| \sum_{\substack{j,k=1 \\ j \neq k}}^n \xi_j \xi'_k \langle A_j, A_k \rangle \right| \right\|_{L_p} = \left\| \sup_{A \in \mathcal{A}} |\langle A\xi, A\xi' \rangle| \right\|_{L_p}. \quad (54)$$

509 Hence our analysis will focus on bounding (54), the  $L_p$ -norm of the decoupled quadratic form. We  
 510 start with the following result:

511 **Lemma 4** Let  $\xi$  be a sub-Gaussian MDS, and  $\xi'$  be a decoupled tangent sequence to  $\xi$ . Then, for  
 512 every  $p \geq 1$ ,

$$\left\| \sup_{A \in \mathcal{A}} \langle A\xi, A\xi' \rangle \right\|_{L_p} \leq \gamma_2(\mathcal{A}, \|\cdot\|_{2 \rightarrow 2}) \cdot \|N_{\mathcal{A}}(\xi)\|_{L_p} + \sup_{A \in \mathcal{A}} \|A\xi, A\xi'\|_{L_p}, \quad (55)$$

513 where  $N_{\mathcal{A}}(\xi) = \sup_{A \in \mathcal{A}} \|A\xi'\|_2$ .

514 *Proof of Lemma 4:* Without loss of generality, assume  $\mathcal{A}$  is finite. Consider the random variable of  
 515 interest:

$$\Gamma = \sup_{A \in \mathcal{A}} |\langle A\xi, A\xi' \rangle|.$$

516 Let  $\{T_r\}_{r=0}^{\infty}$  be an admissible sequence for  $\mathcal{A}$  for which the minimum in the definition of  $\gamma_2(\mathcal{A}, \|\cdot\|_{2 \rightarrow 2})$   
 517 is attained. Let

$$\pi_r A = d_{2 \rightarrow 2}(A, T_r) = \operatorname{argmin}_{B \in T_r} \|B - A\|_{2 \rightarrow 2} \quad \text{and} \quad \Delta_r A = \pi_r A - \pi_{r-1} A.$$

518 For any given  $p \geq 1$ , let  $\ell$  be the largest integer for which  $2^\ell \leq 2p$ . Then, by a direct computation  
 519 based on a telescoping sum and application of triangle inequality, we have

$$|\langle A\xi, A\xi' \rangle - \langle (\pi_\ell A)\xi, (\pi_\ell A)\xi' \rangle| \leq \underbrace{\left| \sum_{r=\ell}^{\infty} \langle (\Delta_{r+1} A)\xi, (\pi_{r+1} A)\xi' \rangle \right|}_{S_1} + \underbrace{\left| \sum_{r=\ell}^{\infty} \langle (\pi_r A)\xi, (\Delta_{r+1} A)\xi' \rangle \right|}_{S_2}. \quad (56)$$

520 We focus on  $S_1$  noting that the analysis for  $S_2$  is similar. Let

$$X_r(A) = \langle (\Delta_{r+1} A)\xi, (\pi_{r+1} A)\xi' \rangle.$$

521 Conditioning  $X_r(A)$  on  $\xi'$ , we note

$$X_r(A) = \langle (\Delta_{r+1} A)\xi, (\pi_{r+1} A)\xi' \rangle = \langle \xi, (\Delta_{r+1} A)^T (\pi_{r+1} A)\xi' \rangle$$

522 a weighted sum of a sub-Gaussian MDS. Then, a direct application of the Azuma-Hoeffding bound  
 523 [] gives

$$P\left(|X_r(A)| > u \|(\Delta_{r+1} A)^T (\pi_{r+1} A)\xi'\|_2 \mid \xi'\right) \leq 2 \exp(-u^2/2).$$

524 Using  $u = t2^{r/2}$ , we get

$$P\left(|X_r(A)| > t2^{r/2} \|(\Delta_{r+1} A)^T (\pi_{r+1} A)\xi'\|_2 \mid \xi'\right) \leq 2 \exp(-t^2 2^r/2).$$

525 Since

$$\|(\Delta_{r+1} A)^T (\pi_{r+1} A)\xi'\| \leq \|\Delta_{r+1} A\|_{2 \rightarrow 2} \sup_{A \in \mathcal{A}} \|A\xi'\|_2.$$

526 we have

$$P\left(|X_r(A)| > t2^{r/2} \|\Delta_{r+1} A\|_{2 \rightarrow 2} \sup_{A \in \mathcal{A}} \|A\xi'\|_2 \mid \xi'\right) \leq 2 \exp(-t^2 2^r/2).$$

527 Now, since  $|\{\pi_r A : A \in \mathcal{A}\}| = |T_r| \leq 2^{2^r}$ , by union bound, we get

$$\begin{aligned} P\left(\sup_{A \in \mathcal{A}} \sum_{r=\ell}^{\infty} |X_r(A)| > t \left(\sup_{A \in \mathcal{A}} \sum_{r=\ell}^{\infty} 2^{r/2} \|\Delta_{r+1} A\|_{2 \rightarrow 2}\right) \cdot \sup_{A \in \mathcal{A}} \|A\xi'\|_2 \mid \xi'\right) \\ \leq 2 \sum_{r=\ell}^{\infty} |T_r| \cdot |T_{r+1}| \cdot \exp(-t^2 2^r/2) \\ \leq 2 \sum_{r=\ell}^{\infty} 2^{2^{r+2}} \cdot \exp(-t^2 2^r/2) \\ \leq 2 \exp(-2^\ell t^2), \end{aligned}$$



for all  $t \geq t_0$ , a constant. Noting that

$$\sup_{A \in \mathcal{A}} \sum_{r=\ell}^{\infty} 2^{r/2} \|\Delta_{r+1} A\|_{2 \rightarrow 2} = \gamma_2(\mathcal{A}, \|\cdot\|_{2 \rightarrow 2})$$

$$\sup_{A \in \mathcal{A}} \|A \xi'\|_2 = N_{\mathcal{A}}(\xi'),$$

we have

$$P\left(\sup_{A \in \mathcal{A}} \sum_{r=\ell}^{\infty} |X_r(A)| > t \gamma_2(\mathcal{A}, \|\cdot\|_{2 \rightarrow 2}) N_{\mathcal{A}}(\xi') \mid \xi'\right) \leq 2 \exp(-pt^2),$$

since  $p \leq 2^\ell$  by construction. In other words, with  $V(\xi') = \gamma_2(\mathcal{A}, \|\cdot\|_{2 \rightarrow 2}) N_{\mathcal{A}}(\xi')$ , for  $t \geq t_0$  we have

$$P\left(S_1 \geq t V(\xi') \mid \xi'\right) \leq 2 \exp(-pt^2).$$

Note that

$$\|S_1\|_{L_p}^p = E_{\xi, \xi'} S_1^p = E_{\xi'} \int_0^\infty pt^{p-1} P(S_1 > t \mid \xi') dt$$

Note that

$$\begin{aligned} \int_0^\infty pt^{p-1} P(S_1 > t \mid \xi') dt &= c^p V(\xi')^p + \int_{cV(\xi')}^\infty pt^{p-1} P(S_1 > t \mid \xi') dt \\ &\leq c^p V(\xi')^p + V(\xi')^p \int_c^\infty p\tau^{p-1} P(S_1 > \tau V(\xi') \mid \xi') d\tau \\ &\leq c_1^p V(\xi')^p, \end{aligned}$$

where  $c \geq t_0$ ,  $c_1$  are suitable constants with depend on  $L$ . As a result,  $\|S_1\|_{L_p} \leq c_1 V(\xi') = c_1 V(\xi)$ .

The bound on  $\|S_2\|_{L_p}$  is the same, and can be derived similarly. As a result

$$\|S_1 + S_2\|_{L_p} \leq c_2 \gamma_2(\mathcal{A}, \|\cdot\|_{2 \rightarrow 2}) N_{\mathcal{A}}(\xi) \|_{L_p} \quad (57)$$

Further, since  $|\{\pi_\ell A : A \in \mathcal{A}\}| \leq 2^{2^\ell} \leq \exp(2p)$ , we have

$$E \sup_{A \in \mathcal{A}} |\langle (\pi_\ell A) \xi, (\pi_\ell A) \xi' \rangle|^p \sum_{A \in T_\ell} E |\langle A \xi, A \xi' \rangle|^p \leq 2^{2p} \sup_{A \in \mathcal{A}} E |\langle A \xi, A \xi' \rangle|^p,$$

so that

$$\left\| \sup_{A \in \mathcal{A}} |\langle (\pi_\ell A) \xi, (\pi_\ell A) \xi' \rangle| \right\|_{L_p} \leq 4 \left\| \sup_{A \in \mathcal{A}} E |\langle A \xi, A \xi' \rangle| \right\|_{L_p}. \quad (58)$$

Combining (56), (57), and (58) using triangle inequality completes the proof.  $\blacksquare$

For the first term in Lemma 4, we have the following bound:

**Lemma 5** *Let  $\xi$  be a MDS. Then*

$$\|N_{\mathcal{A}}(\xi)\|_p \leq \gamma_2(\mathcal{A}, \|\cdot\|_{2 \rightarrow 2}) + d_F(\mathcal{A}) + \sqrt{p} d_{2 \rightarrow 2}(\mathcal{A}). \quad (59)$$

541

*Proof:* Consider the set  $S = \{A^T x : x \in B_2^n, A \in \mathcal{A}\}$ . Since  $\xi$  is a L-sub-Gaussian MDS, we have

$$\begin{aligned} \|N_{\mathcal{A}}(\xi)\|_{L_p} &= (E \sup_{A \in \mathcal{A}, x \in B_2^n} |\langle A \xi, x \rangle|^p)^{1/p} = (E \sup_{u \in S} |\langle \xi, u \rangle|^p)^{1/p} \\ &\stackrel{(a)}{\leq} E \sup_{u \in S} |\langle u, \mathbf{g} \rangle| + \sup_{u \in S} (E |\langle \xi, u \rangle|^p)^{1/p} \\ &= E \sup_{A \in \mathcal{A}, x \in B_2^n} |\langle A \mathbf{g}, x \rangle| + \sqrt{p} \sup_{A \in \mathcal{A}, x \in B_2^n} \|A^T x\|_2 \\ &= E \sup_{A \in \mathcal{A}} N_{\mathcal{A}}(\mathbf{g}) + \sqrt{p} d_{2 \rightarrow 2}(\mathcal{A}) \\ &\stackrel{(b)}{\leq} \gamma_2(\mathcal{A}, \|\cdot\|_{2 \rightarrow 2}) + d_F(\mathcal{A}) + \sqrt{p} d_{2 \rightarrow 2}(\mathcal{A}), \end{aligned}$$

544 where (a) follows from Lemma 7 and (b) follows from [19, Lemma 3.7]. ■

545 For the second term, we have the following bound:

546 **Lemma 6** *Let  $\xi$  be a sub-Gaussian MDS, and  $\xi'$  be a decoupled tangent sequence. Then, for every*  
 547  *$p \geq 1$ ,*

$$\sup_{A \in \mathcal{A}} \|\langle A\xi, A\xi' \rangle\|_{L_p} \leq \sqrt{p} d_F(\mathcal{A}) d_{2 \rightarrow 2}(\mathcal{A}) + p d_{2 \rightarrow 2}^2(\mathcal{A}). \quad (60)$$

548 Proof of Lemma 6 needs the following result:

550 **Lemma 7** *Let  $\mathbf{x}_1, \dots, \mathbf{x}_n \in \mathbb{R}^d$  and  $T \subset \mathbb{R}^d$ . Let  $\xi = \{\xi_j\}$  be a  $L$ -sub-Gaussian MDS and let*  
 551  *$\mathbf{y} = \sum_{j=1}^n \xi_j \mathbf{x}_j$ . Then, for every  $p \geq 1$ ,*

$$\left( E \sup_{t \in T} |\langle t, \mathbf{y} \rangle|^p \right)^{1/p} \leq c_2 \left( E \left[ \sup_{t \in T} |\langle t, \mathbf{g} \rangle| \right] + \sup_{t \in T} (E |\langle t, \mathbf{y} \rangle|^p)^{1/p} \right) \quad (61)$$

552 where  $c_2$  is a constant which depends on  $L$  and  $\mathbf{g} = \sum_{j=1}^n g_j \mathbf{x}_j$  where  $g_i \sim N(0, 1)$  are indepen-  
 553 dent.

554 We need the following basic property of sub-Gaussian random variables [45] to prove Lemma 7.

555 **Proposition 3** *If  $X$  is a  $L$ -sub-Gaussian random variable, then*

$$P(|X| > tL) \leq 2 \exp(-t^2), \quad \forall t \geq 0 \quad \Leftrightarrow \quad (E|X|^p)^{1/p} \leq c_0 \sqrt{p} L, \quad \forall p. \quad (62)$$

556

557 *Proof of Lemma 7.* We assume  $T$  is finite without loss of generality. Let  $\{T_r\}$  be an optimal  
 558 admissible sequence of  $T$ . For any  $t \in T$ , let  $\pi_r(t) = \operatorname{argmin}_{t_r \in T_r} \|t - t_r\|_2$ . For any given  $p$   
 559 determining the  $p$ -norm, choose  $\ell$  such that  $2^{\ell-1} \leq 2p \leq 2^\ell$ , so that  $2^\ell/p \leq 4$ . Then, by triangle  
 560 inequality, we have

$$\sup_{t \in T} |\langle t, \mathbf{y} \rangle| \leq \sup_{t \in T} |\langle \pi_\ell(t), \mathbf{y} \rangle| + \sup_{t \in T} \sum_{r=\ell}^{\infty} |\langle \pi_{r+1}(t) - \pi_r(t), \mathbf{y} \rangle|. \quad (63)$$

561 For the first term, note that

$$\begin{aligned} \left( E \sup_{t \in T} |\langle \pi_\ell(t), \mathbf{y} \rangle|^p \right)^{1/p} &\leq \left( E \sum_{t \in T_\ell} |\langle t, \mathbf{y} \rangle|^p \right)^{1/p} \\ &\leq (|T_\ell|)^{1/p} \sup_{t \in T_\ell} (E |\langle t, \mathbf{y} \rangle|^p)^{1/p} \\ &\leq (2^{2^\ell})^{1/p} \sup_{t \in T} (E |\langle t, \mathbf{y} \rangle|^p)^{1/p} \\ &\leq 16 \sup_{t \in T} (E |\langle t, \mathbf{y} \rangle|^p)^{1/p}. \end{aligned}$$

562 For the second term, since  $\{\xi_j\}$  is a  $L$ -sub-Gaussian MDS, we have

$$\begin{aligned} P \left( \sup_{t \in T} \sum_{r=\ell}^{\infty} |\langle \pi_{r+1}(t) - \pi_r(t), \mathbf{y} \rangle| \geq uL \sum_{r=\ell}^{\infty} 2^{r/2} \|(\langle \pi_{r+1}(t) - \pi_r(t), \mathbf{x}_j \rangle)_{j=1}^n\|_2 \right) \\ \leq \sum_{r=\ell}^{\infty} \sum_{t \in T_{r+1}} \sum_{t' \in T_r} P \left( \left| \sum_{j=1}^n \xi_j \langle t - t', \mathbf{x}_j \rangle \right| \geq uL 2^{r/2} \| \langle t - t', \mathbf{x}_j \rangle_{j=1}^n \|_2 \right) \\ \stackrel{(a)}{\leq} \sum_{r=\ell}^{\infty} 2^{2^{r+1}} \cdot 2^{2^r} \cdot \exp(-2^r u^2/2) \leq 2 \exp(-2^\ell u^2/4) \\ \leq 2 \exp(-pu^2/2), \end{aligned}$$

for  $u > c$ , a constant (see Remark on generic chaining union bound in the sequel), where (a) follows from Azuma-Hoeffding inequality. Then, from Proposition 3, we have

$$\begin{aligned} \left( E \sup_{t \in T} \sum_{r=\ell}^{\infty} |\langle \pi_{r+1}(t) - \pi_r(t), \mathbf{y} \rangle|^p \right)^{1/p} &\leq L \sum_{r=\ell}^{\infty} 2^{r/2} \|(\langle \pi_{r+1}(t) - \pi_r(t), \mathbf{x}_j \rangle)_{j=1}^n\|_2 \\ &\leq L \gamma_2(T', \|\cdot\|_2), \end{aligned}$$

where  $T' = \{(\langle t, \mathbf{x}_j \rangle)_{j=1}^n | t \in T\}$ . Then, by the majorizing measures theorem [42, 41], we have

$$\gamma_2(T', \|\cdot\|_2) \leq E \sup_{t' \in T'} |\langle t', \mathbf{g} \rangle| = E \sup_{t \in T} \left| \sum_{j=1}^n \langle t, \mathbf{x}_j \rangle g_j \right| = E \sup_{t \in T} |\langle t, \mathbf{g} \rangle|.$$

That completes the proof.  $\blacksquare$

Before proceeding further, we show the details of how the union bound works out in generic chaining [42]. We use variants of such union bound analysis several times in our proofs, and this is the only place we show the details. Such analysis is considered standard in the context of generic chain, but as a tool generic chaining is not as widely used.

**Remark: Union bound in generic chaining.** After applying union bound in a generic chaining based analysis, we get a (infinite) sum of the following form:

$$\begin{aligned} \sum_{r=\ell}^{\infty} 2^{2^{r+1}} \cdot 2^{2^r} \cdot \exp(-2^r u^2/2) &= \sum_{r=\ell}^{\infty} 2^{3 \cdot 2^r} \cdot \exp(-2 \cdot 2^r u^2/4) \\ &= \exp(-2^\ell u^2/4) \sum_{r=\ell}^{\infty} \exp(3 \log 2 \cdot 2^r) \cdot \exp(-2 \cdot (2^r - 2^\ell) u^2/4). \end{aligned}$$

Focusing on the exponent, note that

$$\begin{aligned} (3 \log 2) \cdot 2^r - 2 \cdot 2^r u^2/4 + 2^\ell u^2/4 &< -(r - \ell) \\ \Rightarrow -(2^{r+1} - 2^\ell) u^2/2 &< -(r - \ell) - (3 \log 2) \cdot 2^r \\ \Rightarrow (2^{r+1} - 2^\ell) u^2/2 &> (r - \ell) + (3 \log 2) \cdot 2^r \\ \Rightarrow u^2/2 &> \frac{r - \ell}{(2^{r+1} - 2^\ell)} + \frac{(3 \log 2) \cdot 2^r}{2^{r+1} - 2^\ell}. \end{aligned}$$

Note that the last term is a decreasing function of  $r$ , and the maximum is achieved at  $r = \ell$  when we have

$$u^2/2 > (3 \log 2) \quad u > \sqrt{6 \log 2}.$$

Thus, the bound holds for  $u > u_0$  for a constant  $u_0$ .  $\blacksquare$

*Proof of Lemma 6:* For  $A \in \mathcal{A}$  set  $S = \{A^T A \mathbf{x} : \mathbf{x} \in B_2^p\}$ . Since  $\boldsymbol{\xi}$  is a  $L$  sub-Gaussian MDS, the random variable  $\langle \boldsymbol{\xi}, A^T A \boldsymbol{\xi} \rangle$  is a weighted sum of a sub-Gaussian MDS when conditioned on  $\boldsymbol{\xi}'$ . Then, we have

$$\begin{aligned} \|\langle A \boldsymbol{\xi}, A \boldsymbol{\xi}' \rangle\|_{L_p} &= (E_{\boldsymbol{\xi}, \boldsymbol{\xi}'} |\langle A \boldsymbol{\xi}, A \boldsymbol{\xi}' \rangle|^p)^{1/p} \\ &= (E_{\boldsymbol{\xi}} \{E_{\boldsymbol{\xi}'} |\langle \boldsymbol{\xi}', A^T A \boldsymbol{\xi} \rangle|^p\})^{1/p} \\ &\leq (E_{\boldsymbol{\xi}} [L \sqrt{p} \|A^T A \boldsymbol{\xi}'\|_2^p])^{1/p} \\ &\leq L \sqrt{p} \left( E_{\boldsymbol{\xi}} \sup_{y \in S} |\langle y, \boldsymbol{\xi} \rangle|^p \right)^{1/p}. \end{aligned}$$

Now, from Lemma 7, we have

$$\left( E_{\boldsymbol{\xi}} \sup_{y \in S} |\langle y, \boldsymbol{\xi} \rangle|^p \right)^{1/p} \leq E_{\mathbf{g}} \sup_{\mathbf{y} \in S} |\langle \mathbf{g}, \mathbf{y} \rangle| + \sup_{\mathbf{y} \in S} (E_{\boldsymbol{\xi}} |\langle \boldsymbol{\xi}, \mathbf{y} \rangle|^p)^{1/p}.$$

581 For the first term, we have

$$E_{\mathbf{g}} \sup_{\mathbf{y} \in S} |\langle \mathbf{g}, \mathbf{y} \rangle| = E_{\mathbf{g}} \|A^T A \mathbf{g}\|_2 \leq (E \|A^T A \mathbf{g}\|_2^2)^{1/2} = \|A^T A\|_F \leq \|A\|_F \|A\|_{2 \rightarrow 2}.$$

582 For the second term,

$$\sup_{\mathbf{y} \in S} (E |\langle \mathbf{y}, \boldsymbol{\xi} \rangle|^p)^{1/p} = \sup_{z \in B_2^p} (E |\langle A^T A z, \boldsymbol{\xi} \rangle|^p)^{1/p} \leq L \sup_{z \in B_2^p} \sqrt{p} \|A^T A z\|_2 = L \sqrt{p} \|A\|_{2 \rightarrow 2}.$$

583 Plugging these bounds on the two terms back and taking supremum over  $A \in \mathcal{A}$  completes the  
584 proof.  $\blacksquare$

585 *Proof of Theorem 4:* Let  $\boldsymbol{\xi}'$  be a decoupled target sequence to the MDS  $\boldsymbol{\xi}$ . Then we have

$$\begin{aligned} \|B_{\mathcal{A}}(\boldsymbol{\xi})\|_{L_p} &= \sup_{A \in \mathcal{A}} \left| \sum_{\substack{j,k=1 \\ j \neq k}}^n \xi_j \xi_k \langle A_j, A_k \rangle \right| \\ &\stackrel{(a)}{\leq} \sup_{A \in \mathcal{A}} \left| \sum_{j,k=1}^n \xi_j \xi'_j \langle A_j, A_k \rangle \right| \\ &\stackrel{(b)}{\leq} \gamma_2(\mathcal{A}, \|\cdot\|_{2 \rightarrow 2}) \cdot \|N_{\mathcal{A}}(\boldsymbol{\xi})\|_{L_p} + \sup_{A \in \mathcal{A}} \|\langle A \boldsymbol{\xi}, A \boldsymbol{\xi}' \rangle\|_{L_p} \\ &\stackrel{(c)}{\leq} \gamma_2(\mathcal{A}, \|\cdot\|_{2 \rightarrow 2}) \cdot (\gamma_2(\mathcal{A}, \|\cdot\|_{2 \rightarrow 2}) + d_F(\mathcal{A})) \\ &\quad + \sqrt{p} \cdot d_{2 \rightarrow 2}(\mathcal{A}) \cdot (\gamma_2(\mathcal{A}, \|\cdot\|_{2 \rightarrow 2}) + d_F(\mathcal{A})) + p \cdot d_{2 \rightarrow 2}^2(\mathcal{A}), \end{aligned}$$

586 where (a) follows from Theorem 3, (b) follows from Lemma 4, and (c) follows from Lemma 5 and  
587 6. That completes the proof.  $\blacksquare$

### 588 B.3 The Diagonal Terms: Bounded Random Variables

589 For the diagonal terms corresponding to bounded random variables, we have the following main  
590 result:

591 **Theorem 5** Let  $\mathcal{A} \in \mathbb{R}^{m \times n}$  be a collection of  $(m \times n)$  matrices.  $\xi_1, \dots, \xi_n$  be a bounded MDS,  
592 and let  $\boldsymbol{\xi} \in \mathbb{R}^n$  denote a vector of these random variables. Consider the random variable

$$D_{\mathcal{A}}(\boldsymbol{\xi}) = \sup_{A \in \mathcal{A}} \left| \sum_{j=1}^n (\xi_j^2 - E|\xi_j|^2) \|A^j\|_2^2 \right|, \quad (64)$$

593 where  $A^j$  denotes the  $j^{\text{th}}$  column of  $A$ . Then, we have

$$\|D_{\mathcal{A}}(\boldsymbol{\xi})\|_{L_p} \leq d_F(\mathcal{A}) \cdot \gamma_2(\mathcal{A}, \|\cdot\|_{2 \rightarrow 2}) + \sqrt{p} \cdot d_F(\mathcal{A}) \cdot d_{2 \rightarrow 2}(\mathcal{A}). \quad (65)$$

594

595 The main observation here is since  $\xi_j$  are bounded, so are  $\xi_j^2$ , implying  $\eta = \xi_j^2 - E|\xi_j|^2$  is also  
596 sub-Gaussian, and the sequence  $\eta_1, \dots, \eta_n$  is a sub-Gaussian MDS [45]. Based on this observation,  
597 the proof of Theorem 5 relies on the following result bounding  $L_p$ -norms of the supremum of sub-  
598 Gaussian MDSs:

599 **Lemma 8** Let  $\boldsymbol{\zeta} = [\zeta_1, \dots, \zeta_n]$  be a  $L$ -sub-Gaussian MDS and let  $T \in \mathbb{R}^n$ . Then, for every  $p \geq 1$ ,

$$\left( E \sup_{t \in T} |\langle t, \boldsymbol{\zeta} \rangle|^p \right)^{1/p} \leq c_2 \left( E \left[ \sup_{t \in T} |\langle t, \mathbf{g} \rangle| \right] + \sup_{t \in T} (E |\langle t, \boldsymbol{\zeta} \rangle|^p)^{1/p} \right) \quad (66)$$

600 where  $c_2$  is a constant which depends on  $L$ ,  $\mathbf{g} = [g_j]$  where  $g_j \sim N(0, 1)$  are independent identically  
601 distributed normal random variables.

602 *Proof:* We assume  $T$  is finite without loss of generality. Let  $\{T_r\}$  be an optimal admissible se-  
 603 quence of  $T$ . For any  $t \in T$ , let  $\pi_r(t) = \operatorname{argmin}_{t_r \in T_r} \|t - t_r\|_2$ . For any given  $p$  determining the  
 604  $p$ -norm, choose  $\ell$  such that  $2^{\ell-1} \leq 2p \leq 2^\ell$ , so that  $2^\ell/p \leq 4$ . Then, by triangle inequality, we have

$$\sup_{t \in T} |\langle t, \zeta \rangle| \leq \sup_{t \in T} |\langle \pi_\ell(t), \zeta \rangle| + \sup_{t \in T} \sum_{r=\ell}^{\infty} |\langle \pi_{r+1}(t) - \pi_r(t), \zeta \rangle|. \quad (67)$$

605 For the first term, note that

$$\begin{aligned} \left( E \sup_{t \in T} |\langle \pi_\ell(t), \zeta \rangle|^p \right)^{1/p} &\leq \left( E \sum_{t \in T_\ell} |\langle t, \zeta \rangle|^p \right)^{1/p} \\ &\leq (|T_\ell|)^{1/p} \sup_{t \in T_\ell} (E |\langle t, \zeta \rangle|^p)^{1/p} \\ &\leq (2^{2^\ell})^{1/p} \sup_{t \in T} (E |\langle t, \zeta \rangle|^p)^{1/p} \\ &\leq 16 \sup_{t \in T} (E |\langle t, \zeta \rangle|^p)^{1/p}. \end{aligned}$$

606 For the second term, for any  $u \geq 0$ , we have

$$\begin{aligned} P \left( \sup_{t \in T} \sum_{r=\ell}^{\infty} |\langle \pi_{r+1}(t) - \pi_r(t), \zeta \rangle| \geq u L 2^{r/2} \|\pi_{r+1}(t) - \pi_r(t)\|_2 \right) \\ \leq \sum_{t=\ell}^{\infty} \sum_{t \in T_{r+1}} \sum_{t' \in T_r} P \left( \left| \langle t - t', \zeta \rangle \right| \geq u L 2^{r/2} \|t - t'\|_2 \right) \\ \stackrel{(a)}{\leq} \sum_{r=\ell}^{\infty} 2^{2^{r+1}} \cdot 2^{2^r} \cdot \exp(-2^r u^2) \leq 2 \exp(-2^\ell u^2) \\ \leq 2 \exp(-p u^2), \end{aligned}$$

607 for  $u \geq u_0$ , a constant, and where (a) follows from the Azuma-Hoeffding inequality.

608 Then, from Proposition 3, we have

$$\left( E \sup_{t \in T} \sum_{r=\ell}^{\infty} |\langle \pi_{r+1}(t) - \pi_r(t), \zeta \rangle|^p \right)^{1/p} \leq L \sum_{r=\ell}^{\infty} \left( 2^{r/2} \|\pi_{r+1}(t) - \pi_r(t)\|_2 \right) \leq L \gamma_2(T, \|\cdot\|_2).$$

609 Then, by the majorizing measures theorem [11], we have

$$\gamma_2(T, \|\cdot\|_2) \leq E \sup_{t \in T} |\langle t, \mathbf{g} \rangle|,$$

610 where  $\mathbf{g} = [g_j]$ ,  $g_j \sim N(0, 1)$ . That completes the proof.  $\blacksquare$

611 *Proof of Theorem 5.* Consider the random variable  $\zeta^{(A)} = \sum_{j=1}^n (\xi_j^2 - E|\xi_j|^2) \|A^j\|_2^2$ . Then, for  
 612 any  $A, B \in \mathcal{A}$ , by Azuma-Hoeffding inequality, we have

$$P \left( |\zeta^{(A)} - \zeta^{(B)}| \geq \varepsilon \right) \leq 2 \exp \left\{ -\frac{\varepsilon^2}{d_2^2(A, B)} \right\}, \quad (68)$$

613 where

$$\begin{aligned} d_2(A, B) &= \left( \sum_{j=1}^n (\|A^j\|_2^2 - \|B^j\|_2^2)^2 \right)^{1/2} \\ &= \left( \sum_{j=1}^n (\|A^j\|_2 - \|B^j\|_2)^2 \cdot (\|A^j\|_2 + \|B^j\|_2)^2 \right)^{1/2} \\ &\stackrel{(a)}{\leq} \left( \sum_{j=1}^n \|A^j - B^j\|_2^2 \cdot (\|A^j\|_2 + \|B^j\|_2)^2 \right)^{1/2} \\ &\leq 2d_F(\mathcal{A}) \|A - B\|_{2 \rightarrow 2}, \end{aligned}$$

614 where (a) follows from triangle inequality. From the majorizing measure theorem [42] we have  
 615  $E[\sup_{t \in T} |\langle t, \mathbf{g} \rangle|] \leq \gamma_2(T, d_2)$ . Then, from Lemma 8 and Proposition 3, we have

$$\|D_{\mathcal{A}}(\xi)\|_{L_p} \leq d_F(\mathcal{A}) \cdot \gamma_2(\mathcal{A}, \|\cdot\|_{2 \rightarrow 2}) + \sqrt{p} \cdot d_F(\mathcal{A}) \cdot d_{2 \rightarrow 2}(\mathcal{A}).$$

616 That completes the proof. ■

#### 617 **B.4 The Diagonal Terms: Unbounded sub-Gaussian Random Variables**

618 For the diagonal terms corresponding to unbounded sub-Gaussian random variables, we have the  
 619 following main result:

620 **Theorem 6** *Let  $\mathcal{A} \in \mathbb{R}^{m \times n}$  be a collection of  $(m \times n)$  matrices.  $\xi_1, \dots, \xi_n$  be a sub-Gaussian*  
 621 *MDS, and let  $\xi \in \mathbb{R}^n$  denote a vector of these random variables. Consider the random variable*

$$D_{\mathcal{A}}(\xi) = \sup_{A \in \mathcal{A}} \left| \sum_{j=1}^n (\xi_j^2 - E|\xi_j|^2) \|A^j\|_2^2 \right|, \quad (69)$$

622 where  $A^j$  denotes the  $j^{\text{th}}$  column of  $A$ . Then, we have

$$\|D_{\mathcal{A}}(\xi)\|_{L_p} \leq \sqrt{\log n} \cdot d_F(\mathcal{A}) \cdot \gamma_2(\mathcal{A}, \|\cdot\|_{2 \rightarrow 2}) + \sqrt{p} \cdot d_F(\mathcal{A}) \cdot d_{2 \rightarrow 2}(\mathcal{A}) + p \cdot d_F(\mathcal{A}) \cdot d_{2, \infty}(\mathcal{A}). \quad (70)$$

623

624 The proof of Theorem 6 relies on the following result bounding  $L_p$ -norms of the supremum of  
 625 sub-exponential MDS processes: (a)

626 **Lemma 9** *Let  $\zeta = [\zeta_1, \dots, \zeta_n]$  be a  $L$ -sub-exponential MDS and let  $T \in \mathbb{R}^n, n \geq 2$ . Then, for*  
 627 *every  $p \geq 1$ ,*

$$\left( E \sup_{t \in T} |\langle t, \zeta \rangle|^p \right)^{1/p} \leq c_2 \left( \sqrt{\log n} \cdot E \left[ \sup_{t \in T} |\langle t, \mathbf{g} \rangle| \right] + \sup_{t \in T} (E|\langle t, \zeta \rangle|^p)^{1/p} \right) \quad (71)$$

628 where  $c_2$  is a constant which depends on  $L$ ,  $\mathbf{g} = [g_j]$  where  $g_j$  are independent identically distributed  
 629 normal random variables, and  $\eta = [\eta_j]$  where  $\eta_j$  are independent identically distributed exponential  
 630 random variables.

631 We need the following basic property of sub-exponential random variables to prove Lemma 9.

632 **Proposition 4** *If  $X$  is a  $L$ -sub-exponential random variable, then*

$$P(|X| > tL) \leq 2 \exp(-t), \quad \forall t \geq 0 \quad \Leftrightarrow \quad (E|X|^p)^{1/p} \leq c_0 p L, \quad \forall p. \quad (72)$$

633

634 We also need the following result on mixed tails:

635 **Proposition 5** *Consider a random variable  $X$  such that*

$$P(|X| > \sqrt{t}L_2 + tL_1) \leq 2 \exp(-t), \quad \forall t \geq 0. \quad (73)$$

636 Then

$$(E|X|^p)^{1/p} \leq c_0 \sqrt{p}L_2 + pL_1, \quad \forall p \geq 1. \quad (74)$$

637

638 *Proof:* Note that for  $\sqrt{t}L_1 \leq tL_1$ , we have

$$\begin{aligned} P(|X| > 2\sqrt{t}L_2) &\leq P(|X| > \sqrt{t}L_2 + tL_1) \leq 2 \exp(-t) \\ \Rightarrow P(|X| > t) &\leq 2 \exp(-t^2/4L_2^2). \end{aligned}$$

639 For  $\sqrt{t}L_1 \geq tL_1$ , we have

$$\begin{aligned} P(|X| > 2tL_1) &\leq P(|X| > \sqrt{t}L_2 + tL_1) \leq 2\exp(-t) \\ \Rightarrow P(|X| > t) &\leq 2\exp(-t/2L_1). \end{aligned}$$

640 Hence, for all  $t \geq 0$

$$P(|X| > t) \leq 2\exp(-\min(t^2/4L_2^2, t/2L_1)). \quad (75)$$

641 Now, recall that for any non-negative random variable  $E[Z] = \int_0^\infty P(Z \geq u)du$ . Using  $Z =$   
642  $|X|^p$ ,  $u = t^p$ , we have

$$\begin{aligned} E|X|^p &= \int_0^\infty P(|X| > t)pt^{p-1}dt \\ &\leq \underbrace{2 \int_0^\infty \exp(-t^2/4L_2^2)pt^{p-1}dt}_{\mathcal{I}_1} + \underbrace{2 \int_0^\infty \exp(-t/2L_1)pt^{p-1}dt}_{\mathcal{I}_2}. \end{aligned}$$

643 For the first term  $\mathcal{I}_1$ , consider change of variables  $t_2 = t/2L_2$ , so  $dt = 2L_2dt_2$  to give

$$\mathcal{I}_1 = 2 \cdot 2^p L_2^p p \int_0^\infty \exp(-t_2^2)t_2^{p-1}dt_2 \leq 2c_2^p L_2^p p(p)^{p/2},$$

644 for a suitable constant  $c_2$ , following Proposition 3 [44]. For the second term  $\mathcal{I}_2$ , consider change of  
645 variables  $t_1 = t/2L_1$ , so  $dt = 2L_1dt_1$  to give

$$\mathcal{I}_2 = 2 \cdot 2^p L_1^p p \int_0^\infty \exp(-t_1)t_1^{p-1}dt_1 \leq 2c_1^p L_1^p p(p)^p,$$

646 for a suitable constant  $c_1$ , following Proposition 4 [44]. Taking  $p$ -th roots and using Jensen's in-  
647 equality, we have

$$(E|X|^p)^{1/p} \leq (\mathcal{I}_1)^{1/p} + (\mathcal{I}_2)^{1/p} \leq c_0(\sqrt{p}L_2 + pL_1),$$

648 for a suitable constant  $c_0 > 0$ . That completes the proof.  $\blacksquare$

649 We also need the following result from [40]:

650 **Theorem 7** For any  $T \subset \mathbb{R}^n$ , we have

$$E \left[ \sup_{t \in T} |\langle t, \boldsymbol{\eta} \rangle| \right] \leq \sqrt{\log n} \cdot E \left[ \sup_{t \in T} |\langle t, \mathbf{g} \rangle| \right], \quad (76)$$

651 where  $\mathbf{g} = [g_j]$  where  $g_j$  are independent identically distributed normal random variables, and  
652  $\boldsymbol{\eta} = [\eta_j]$  where  $\eta_j$  are independent identically distributed exponential random variables.

653 *Proof of Lemma 9.* We assume  $T$  is finite without loss of generality. Let  $\{T_r\}$  be an optimal  
654 admissible sequence of  $T$ . For any  $t \in T$ , let  $\pi_r(t) = \operatorname{argmin}_{t_r \in T_r} \|t - t_r\|_2$ . For any given  $p$   
655 determining the  $p$ -norm, choose  $\ell$  such that  $2^{\ell-1} \leq 2p \leq 2^\ell$ , so that  $2^\ell/p \leq 4$ . Then, by triangle  
656 inequality, we have

$$\sup_{t \in T} |\langle t, \boldsymbol{\zeta} \rangle| \leq \sup_{t \in T} |\langle \pi_\ell(t), \boldsymbol{\zeta} \rangle| + \sup_{t \in T} \sum_{r=\ell}^\infty |\langle \pi_{r+1}(t) - \pi_r(t), \boldsymbol{\zeta} \rangle|. \quad (77)$$

657 For the first term, note that

$$\begin{aligned} \left( E \sup_{t \in T} |\langle \pi_\ell(t), \boldsymbol{\zeta} \rangle|^p \right)^{1/p} &\leq \left( E \sum_{t \in T_\ell} |\langle t, \boldsymbol{\zeta} \rangle|^p \right)^{1/p} \\ &\leq (|T_\ell|)^{1/p} \sup_{t \in T_\ell} (E |\langle t, \boldsymbol{\zeta} \rangle|^p)^{1/p} \\ &\leq (2^{2^\ell})^{1/p} \sup_{t \in T} (E |\langle t, \boldsymbol{\zeta} \rangle|^p)^{1/p} \\ &\leq 16 \sup_{t \in T} (E |\langle t, \boldsymbol{\zeta} \rangle|^p)^{1/p}. \end{aligned}$$

658 For the second term, for any  $u \geq 0$ , we have

$$\begin{aligned}
& P \left( \sup_{t \in T} \sum_{r=\ell}^{\infty} |\langle \pi_{r+1}(t) - \pi_r(t), \zeta \rangle| \geq \sqrt{u} L 2^{r/2} \|\pi_{r+1}(t) - \pi_r(t)\|_2 \right. \\
& \quad \left. + u L 2^r \|\pi_{r+1}(t) - \pi_r(t)\|_{\infty} \right) \\
& \leq \sum_{t=\ell}^{\infty} \sum_{t \in T_{r+1}} \sum_{t' \in T_r} P \left( \left| \langle t - t', \zeta \rangle \right| \geq \sqrt{u} L 2^{r/2} \|t - t'\|_2 \right. \\
& \quad \left. + u L 2^r \|t - t'\|_{\infty} \right) \\
& \stackrel{(a)}{\leq} \sum_{r=\ell}^{\infty} 2^{2^{r+1}} \cdot 2^{2^r} \cdot \exp(-2^r u) \leq 2 \exp(-2^{\ell} u) \\
& \leq 2 \exp(-pu),
\end{aligned}$$

659 for  $u \geq u_0$ , a constant, and where (a) follows from the Azuma-Bernstein inequality.

660 Then, from Proposition 5, we have

$$\begin{aligned}
& \left( E \sup_{t \in T} \sum_{r=\ell}^{\infty} |\langle \pi_{r+1}(t) - \pi_r(t), \zeta \rangle|^p \right)^{1/p} \leq L \sum_{r=\ell}^{\infty} \left( 2^{r/2} \|\pi_{r+1}(t) - \pi_r(t)\|_2 \right. \\
& \quad \left. + 2^r \|\pi_{r+1}(t) - \pi_r(t)\|_{\infty} \right) \\
& \leq L(\gamma_2(T, \|\cdot\|_2) + \gamma_1(T, \|\cdot\|_{\infty})).
\end{aligned}$$

661 Then, by the majorizing measures theorem [1], we have

$$\gamma_2(T, \|\cdot\|_2) \leq E \sup_{t \in T} |\langle t, \mathbf{g} \rangle|, \quad \text{and} \quad \gamma_1(T, \|\cdot\|_{\infty}) \leq E \sup_{t \in T} |\langle t, \boldsymbol{\eta} \rangle| \stackrel{(a)}{\leq} \sqrt{\log n} \cdot E \sup_{t \in T} |\langle t, \mathbf{g} \rangle|$$

662 where (a) follows from Theorem 7. Noting that  $(1 + \sqrt{\log n}) \leq 3\sqrt{\log n}$  for  $n \geq 2$  completes the  
663 proof. ■

664 *Proof of Theorem 6.* Consider the random variable  $\zeta^{(A)} = \sum_{j=1}^n (\xi_j^2 - E|\xi_j|^2) \|A^j\|_2^2$ . Then, for  
665 any  $A, B \in \mathcal{A}$ , by Azuma-Bernstein inequality, we have

$$P \left( |\zeta^{(A)} - \zeta^{(B)}| \geq \varepsilon \right) \leq 2 \exp \left\{ - \min \left( \frac{\varepsilon^2}{d_2^2(A, B)}, \frac{\varepsilon}{d_1(A, B)} \right) \right\}, \quad (78)$$

666 where

$$\begin{aligned}
d_2(A, B) &= \left( \sum_{j=1}^n (\|A^j\|_2^2 - \|B^j\|_2^2)^2 \right)^{1/2} \\
&= \left( \sum_{j=1}^n (\|A^j\|_2 - \|B^j\|_2)^2 \cdot (\|A^j\|_2 + \|B^j\|_2)^2 \right)^{1/2} \\
&\stackrel{(a)}{\leq} \left( \sum_{j=1}^n \|A^j - B^j\|_2^2 \cdot (\|A^j\|_2 + \|B^j\|_2)^2 \right)^{1/2} \\
&\leq 2d_F(\mathcal{A}) \|A - B\|_{2 \rightarrow 2},
\end{aligned}$$



667 where (a) follows from triangle inequality, and

$$\begin{aligned}
d_1(A, B) &= \left\| \|A^j\|_2^2 - \|B^j\|_2^2 \right\|_\infty \\
&= \left\| (\|A^j\|_2 - \|B^j\|_2)(\|A^j\|_2 + \|B^j\|_2) \right\|_\infty \\
&\stackrel{(a)}{\leq} 2d_F(\mathcal{A}) \left\| \|A^j - B^j\|_2 \right\|_\infty \\
&= d_F(\mathcal{A}) \|A - B\|_{2,\infty},
\end{aligned}$$

668 where (a) follows from triangle inequality. Also, recall from the majorizing measure theorem that  
669  $E[\sup_{t \in T} |\langle t, \mathbf{g} \rangle|] \leq \gamma_2(T, d_2)$ . Then, from Lemma 9 and Proposition 5, we have

$$\|D_{\mathcal{A}}(\xi)\|_{L_p} \leq \sqrt{\log n} \cdot d_F(\mathcal{A}) \cdot \gamma_2(\mathcal{A}, \|\cdot\|_{2 \rightarrow 2}) + \sqrt{p} \cdot d_F(\mathcal{A}) \cdot d_{2 \rightarrow 2} + p \cdot d_F(\mathcal{A}) \cdot d_{2,\infty}(\mathcal{A}).$$

670 That completes the proof.  $\blacksquare$

## 671 C Proofs of Theorem 1 and Theorem 2

672 With the existing bounds on the  $L_p$  norms of the off-diagonal and diagonal terms from Section B.1,  
673 the proofs of the main results, Theorem 1 and Theorem 2, follow from (51)-(53).

674 *Proof of Theorem 1:* For bounded random variables, the main result follows by combining the off-  
675 diagonal  $L_p$  norm bound in Theorem 4 and the diagonal  $L_p$  norm bound in Theorem 5 and (51)-(53).  
676  $\blacksquare$

677 *Proof of Theorem 2:* For unbounded sub-Gaussian random variables, the main result follows by  
678 combining the off-diagonal  $L_p$  norm bound in Theorem 4 and the diagonal  $L_p$  norm bound in  
679 Theorem 6 and (51)-(53).  $\blacksquare$

## 680 D The Azuma-Hoeffding Inequality

681 A sequence of random variables  $Z_1, Z_2, \dots$ , is called a *martingale difference sequence* (MDS)  
682 with respect to another sequence of random variables  $X_1, X_2, \dots$ , if for any  $t$ ,  $E[Z_t] < \infty$   
683 and  $E[Z_t | X_1, \dots, X_{t-1}] = 0$  almost surely. By construction, if  $X_t$  is a martingale, then  $Z_t =$   
684  $X_t - X_{t-1}$  will be a MDS, which explains the name.

685 Let  $\{X_t, t = 0, 1, 2, \dots\}$  be a martingale sequence, and let  $Z_t = X_t - X_{t-1}$  be a MDS. Assume  
686 that  $Z_t$  is bounded, i.e.,

$$|Z_t| = |X_t - X_{t-1}| < c_t, \quad (79)$$

687 and let  $\mathbf{c} = [c_1 \dots c_T]$  be the vector of the upper bounds. Then, the Azuma-Hoeffding inequality  
688 states that: for any  $\tau > 0$ ,

$$P\left(\left|\sum_{t=1}^T Z_t\right| \geq \tau\right) \leq 2 \exp\left\{-\frac{\tau^2}{2\|\mathbf{c}\|_2^2}\right\}. \quad (80)$$

689 For the special case when  $c_t = c$ , the bound can be simplified to: for any  $\epsilon > 0$

$$P\left(\frac{1}{T} \left|\sum_{t=1}^T Z_t\right| \geq \epsilon\right) \leq 2 \exp\left\{-T \frac{\epsilon^2}{2c^2}\right\}. \quad (81)$$

690 The result can be extended to the setting of general subGaussian tails for  $Z_t$ , e.g., see [39], and also  
691 applies to general MDSs  $Z_t | \mathcal{F}_{t-1}$  where  $\{\mathcal{F}_t\}$  is the filtration.

## 692 E The Azuma-Bernstein Inequality

693 Let  $\{X_t, t = 0, 1, 2, \dots\}$  be a martingale sequence, and let  $Z_t = X_t - X_{t-1}$  be a MDS. However,  
694 we now assume that  $Z_t | X_1, \dots, X_{t-1}$  has a sub-exponential tail, so that

$$P(|Z_t | X_1, \dots, X_{t-1}| \geq \tau) \leq 2 \exp(-c\tau/\kappa), \quad (82)$$

695 where  $\kappa = \|Z_t | X_1, \dots, X_{t-1}\|_{\psi_1}$  is the sub-exponential norm or  $\psi_1$  norm [44]. Then, we have the  
696 following result:

697 **Theorem 8** Let  $\{Z_t\}$  be a MDS which satisfies (82). Then, for every  $\mathbf{a} = [a_1 \dots a_T] \in \mathbb{R}^T$ , for  
 698 any  $\tau > 0$ , we have

$$P\left(\left|\sum_{t=1}^T a_t Z_t\right| \geq \tau\right) \leq 2 \exp\left\{-\min\left(\frac{\tau^2}{4c\kappa^2\|\mathbf{a}\|_2^2}, \frac{\eta\tau}{2\kappa\|\mathbf{a}\|_\infty}\right)\right\}, \quad (83)$$

699 for absolute constants  $c, \eta > 0$ . In particular, for any  $\epsilon > 0$ , for a constant  $\gamma > 0$ , we have

$$P\left(\frac{1}{T}\left|\sum_{t=1}^T Z_t\right| \geq \epsilon\right) \leq 2 \exp\left\{-\gamma T \min\left(\frac{\epsilon^2}{\kappa^2}, \frac{\epsilon}{\kappa}\right)\right\}. \quad (84)$$

700 *Proof:* Recall that if  $Y$  is a sub-exponential random variable, then the moment-generating function  
 701 (MGF) of  $Y$  satisfies the following result [44, Lemma 5.15]: For  $s$  such that  $|s| \leq \eta/\kappa_1$ , we have

$$E[\exp(sY)] \leq \exp(cs^2\kappa^2), \quad (85)$$

702 where  $\kappa_1 = \|Y\|_{\psi_1}$  and  $\eta, c$  are absolute constants. In particular, since  $Z_t|\mathcal{F}_{t-1}$  are subexponential,  
 703 with  $\kappa_1 = \max_t \|Z_t|X_1, \dots, X_{t-1}\|_{\psi_1}$ , for  $|s| \leq \eta/\kappa_1$ , we have

$$E_{X_t|X_1, \dots, X_{t-1}}[\exp(sZ_t)] \leq \exp(cs^2\kappa_1^2), \quad \forall t. \quad (86)$$

704 For any  $s > 0$ , note that

$$P\left(\sum_{t=1}^T a_t Z_t \geq \tau\right) = P\left(\exp\left(s \sum_{t=1}^T a_t Z_t\right) \geq \exp(s\tau)\right) \leq \exp(-s\tau) E\left[\exp\left(s \sum_{t=1}^T a_t Z_t\right)\right]. \quad (87)$$

705 For  $|s| \leq \eta/(\kappa_1\|\mathbf{a}\|_\infty)$  so that  $|a_t s| \leq \eta/\kappa_1$  for all  $t$ , the expectation can be bounded using (86) as  
 706 follows:

$$\begin{aligned} E\left[\exp\left(s \sum_{t=1}^T a_t Z_t\right)\right] &= E_{(X_1, \dots, X_T)}\left[\prod_{t=1}^T \exp(sa_t Z_t)\right] \\ &= E_{(X_1, \dots, X_{T-1})}\left[E_{X_T|X_1, \dots, X_{T-1}}[\exp(sa_T Z_T)] \prod_{t=1}^{T-1} \exp(sa_t Z_t)\right] \\ &\leq \exp(cs^2 a_T^2 \kappa^2) E_{(X_1, \dots, X_{T-1})}\left[\prod_{t=1}^{T-1} \exp(sa_t Z_t)\right] \\ &\leq \exp(cs^2 a_T^2 \kappa^2) \exp(cs^2 a_{T-1}^2 \kappa^2) E_{(X_1, \dots, X_{T-2})}\left[\prod_{t=1}^{T-2} \exp(sa_t Z_t)\right] \\ &\dots \\ &\leq \exp(cs^2 \kappa^2 \|\mathbf{a}\|_2^2). \end{aligned}$$

707 Plugging this back to (87), for  $|s| \leq \eta/\kappa$ , we have

$$P\left(\sum_{t=1}^T a_t Z_t \geq \tau\right) \leq \exp(-s\tau + cs^2 \kappa^2 \|\mathbf{a}\|_2^2). \quad (88)$$

708 Choosing  $s = \min\left(\frac{\tau}{2c\kappa^2\|\mathbf{a}\|_2^2}, \frac{\eta}{\kappa\|\mathbf{a}\|_\infty}\right)$ , we obtain

$$P\left(\sum_{t=1}^T a_t Z_t \geq \tau\right) \leq \exp\left\{-\min\left(\frac{\tau^2}{4c\kappa^2\|\mathbf{a}\|_2^2}, \frac{\eta\tau}{2\kappa\|\mathbf{a}\|_\infty}\right)\right\}. \quad (89)$$

709 Repeating the same argument with  $-Z_t$  instead of  $X_t$ , we obtain the same bound for  
 710  $P(-\sum_t a_t Z_t \geq \tau)$ . Combining the two results gives us (83).

711 Now, with  $a_t = 1, t = 1, \dots, T$ , and  $\tau = T\epsilon$  in (83), for a suitable constant  $\gamma > 0$  we have

$$P\left(\frac{1}{T}\left|\sum_{t=1}^T Z_t\right| \geq \epsilon\right) \leq \exp\left\{-\gamma T \min\left(\frac{\epsilon^2}{\kappa^2}, \frac{\epsilon}{\kappa}\right)\right\}. \quad (90)$$

712 That completes the proof. ■

713 The result can also be stated in terms of a general sub-exponential MDS  $Z_t|\mathcal{F}_{t-1}$ , where  $\{\mathcal{F}_t\}$  is the  
714 filtration.
